# Supplementary material for: The relationship of lung function with ambient temperature
Source: PubMed Central journal article supplement (PMC5773195; doi:10.1371/journal.pone.0191409), 2018-01-18

**Supplemental Figure 1. Study Exclusions**

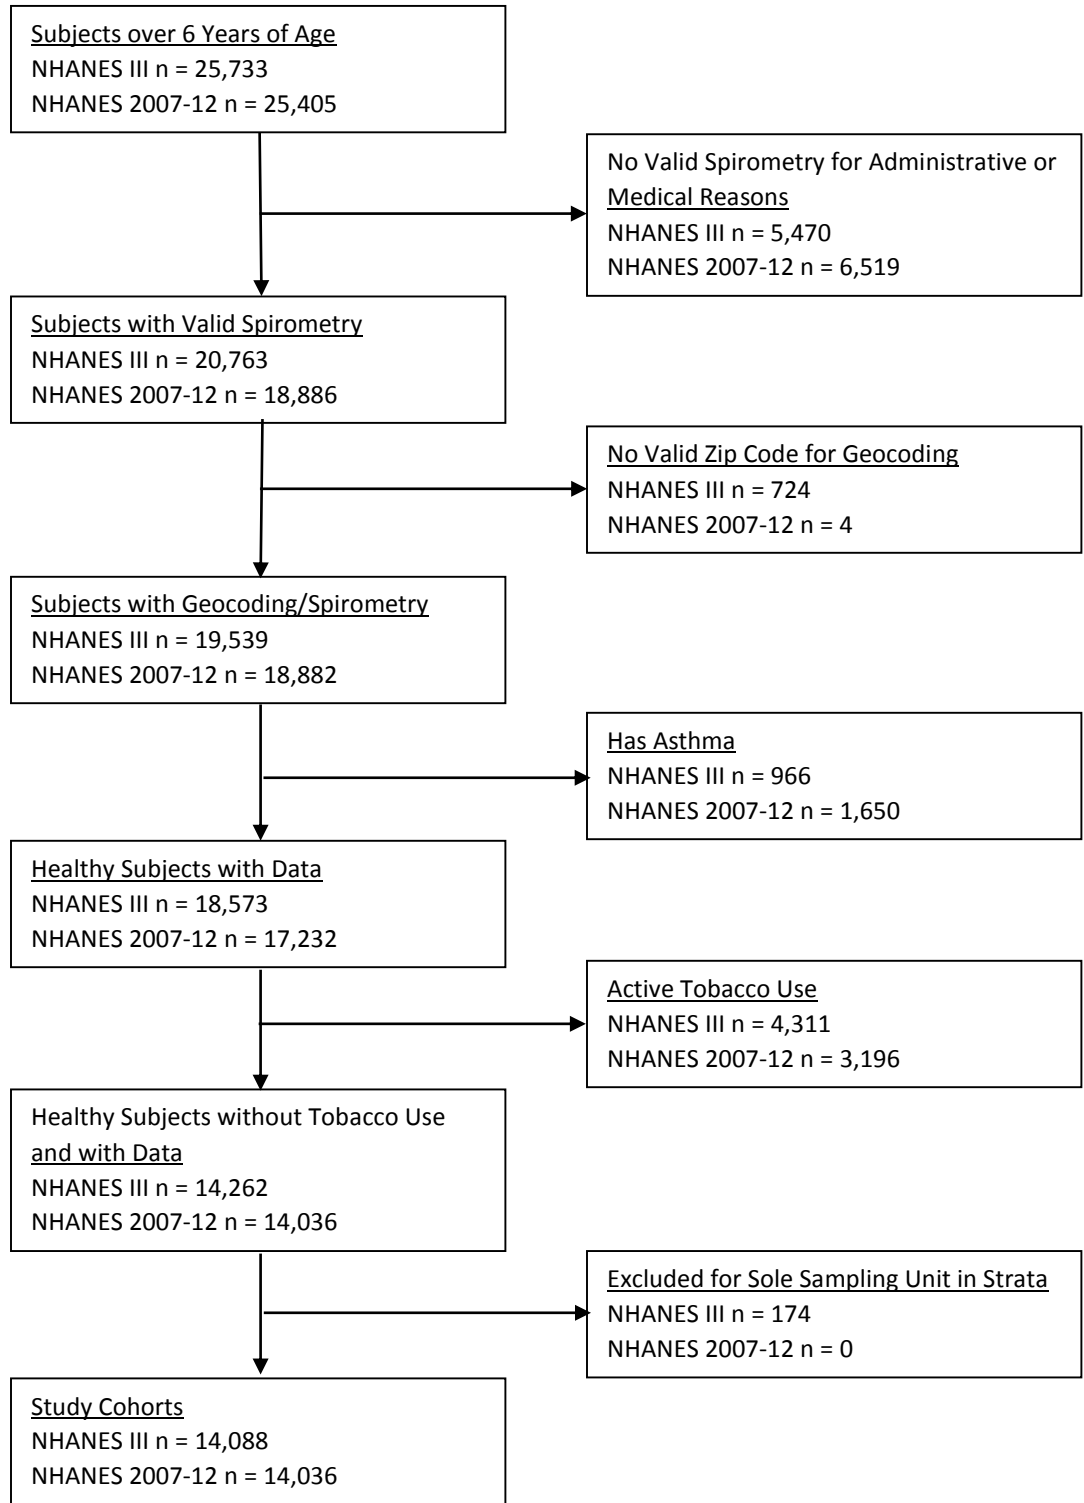

Supplement: pone.0191409.s001.pdf [file pone.0191409.s001.pdf]
